# Supplementary material for: Zein Nanoparticles Containing Arginine-Based Surfactants: Physicochemical Characterization and Effect on the Biological Properties
Source: MDPI journal article supplement (doi:10.3390/ijms24032568), 2023-01-29
Supplement: s1 [file s1]

**Table S1.** Composition, size and charge of Blank nanoparticles, LAM, C<sub>3</sub>(LA)<sub>2</sub>, C<sub>6</sub>(LA)<sub>2</sub> and C<sub>9</sub>(LA)<sub>2</sub> loaded-zein nanoparticles.

| <b>Formulation</b>                       | <b>Zein<br/>(% w/v)</b> | <b>Surfactant<br/>(% w/v)</b> | <b>Size<br/>DLS<br/>(nm)</b> | <b>pdI</b> | <b>Size<br/>TEM<br/>(nm)</b> | <b>Zeta<br/>potential<br/>(mV)</b> |
|------------------------------------------|-------------------------|-------------------------------|------------------------------|------------|------------------------------|------------------------------------|
| <b>BNp-A</b>                             | 0.0712                  | -                             | 294.9                        | 0.066      | 228                          | +18.4                              |
| <b>BNp-B</b>                             | 0.0712                  | -                             | 267.6                        | 0.05       | 179                          | +13.0                              |
| <b>NpLAM-A</b>                           | 0.0712                  | 0.00712                       | 287                          | 0.048      | 141                          | +29.7                              |
| <b>NpLAM-B</b>                           | 0.0712                  | 0.00712                       | 208.8                        | 0.057      | 129                          | +36.8                              |
| <b>NpC<sub>3</sub>(LA)<sub>2</sub>-A</b> | 0.0712                  | 0.00712                       | 341.1                        | 0.204      | 194                          | +53.5                              |
| <b>NpC<sub>3</sub>(LA)<sub>2</sub>-B</b> | 0.0712                  | 0.00712                       | 308                          | 0.12       | 136                          | +42.3                              |
| <b>NpC<sub>6</sub>(LA)<sub>2</sub>-A</b> | 0.0712                  | 0.00712                       | 200.5                        | 0.068      | 214                          | +38.3                              |
| <b>NpC<sub>6</sub>(LA)<sub>2</sub>-B</b> | 0.0712                  | 0.00712                       | 238                          | 0.005      | 164                          | +49.9                              |
| <b>NpC<sub>9</sub>(LA)<sub>2</sub>-A</b> | 0.0712                  | 0.00712                       | 180.9                        | 0.029      | 132                          | +50.5                              |
| <b>NpC<sub>9</sub>(LA)<sub>2</sub>-B</b> | 0.0712                  | 0.00712                       | 229.1                        | 0.091      | 121                          | +49.7                              |

Unloaded nanoparticles (Blank nanoparticles, BNp), method A (A), method B (B). Dynamic light scattering (DLS), Transmission Electron Microscopy (TEM), Polydispersity Index (pdI)

**Table S2.**  $^1\text{H}$  Chemical shift (ppm) assignment of samples of the pure molecules LAM,  $\text{C}_3(\text{LA})_2$ ,  $\text{C}_6(\text{LA})_2$  and  $\text{C}_9(\text{LA})_2$  dissolved in  $\text{CD}_3\text{OD}$ :  $\text{D}_2\text{O}$  9:1 (v/v) at 25  $^\circ\text{C}$ . The numbering scheme of the atoms is given in the structures of Figure 5. The chemical shifts are referenced respect to the TMS signal at 0 ppm.

| Signal<br>LAM | $^1\text{H}$<br>(ppm) | Signal<br>$\text{C}_3(\text{LA})_2$ | $^1\text{H}$<br>(ppm) | Signal<br>$\text{C}_6(\text{LA})_2$ | $^1\text{H}$<br>(ppm) | Signal<br>$\text{C}_9(\text{LA})_2$ | $^1\text{H}$<br>(ppm) |
|---------------|-----------------------|-------------------------------------|-----------------------|-------------------------------------|-----------------------|-------------------------------------|-----------------------|
| 1             | 2.161                 | 1                                   | 1.524                 | 1                                   | 1.417                 | 1                                   | 1.399                 |
| 3             | 4.338                 | 2                                   | 3.139                 | 2                                   | 3.093                 | 2                                   | 3.080                 |
| 4             | 1.813                 | 3                                   | 4.203                 | 3                                   | 4.217                 | 3                                   | 4.213                 |
| 5             | 1.638                 | 4                                   | 1.760                 | 4                                   | 1.722                 | 4                                   | 1.724                 |
| 6             | 3.118                 | 5                                   | 1.604                 | 5                                   | 1.586,<br>1.510       | 5                                   | 1.576,<br>1.504       |
| 8             | 1.519                 | 6                                   | 3.139                 | 6                                   | 3.122                 | 6                                   | 3.112                 |
| 9             | 1.219,<br>1.188       | 7                                   | 2.200                 | 7                                   | 2.175                 | 7                                   | 2.168                 |
| 10            | 3.637                 | 8                                   | 1.524                 | 8                                   | 1.510                 | 8                                   | 1.504                 |
| 11            | 0.795                 | 9                                   | 1.230                 | 9                                   | 1.221                 | 9                                   | 1.211                 |
| 12            | 8.231                 | 10                                  | 1.200                 | 10                                  | 1.190                 | 10                                  | 1.185                 |
| 13            | Not<br>observed       | 11                                  | 1.200                 | 11                                  | 1.190                 | 11                                  | 1.185                 |
| 14            | Not<br>observed       | 12                                  | 0.810                 | 12                                  | 0.805                 | 12                                  | 0.795                 |
| 15            | 7.363                 | 13                                  | 8.040                 | 13                                  | 7.985                 | 13                                  | 7.976                 |
|               |                       | 14                                  | 8.019                 | 14                                  | 7.929                 | 14                                  | 7.884                 |
|               |                       | 15                                  | Not<br>observed       | 15                                  | 7.180,<br>7.271       | 15                                  | Not<br>observed       |
|               |                       | 16                                  | 7.396                 | 16                                  | 7.384                 | 16                                  | 7.374                 |

**Table S3.** Results of interaction details and docking score in (kJ/mol) of C<sub>3</sub>(LA)<sub>2</sub> ligand complexed in different binding sites on the surfaces on the zein structures (Q9SYT3\_MAIZE).

| Docking Score (kJ/mol) | Pocket | Ligand                        | Receptor Pocket | Interactions type          | Interactions category      | Distance (Å) |
|------------------------|--------|-------------------------------|-----------------|----------------------------|----------------------------|--------------|
| <b>-6.2</b>            | 1      | H(NH Amide)                   | ASN168          | Hydrogen Bond              | Conventional Hydrogen Bond | 2.39496      |
|                        |        | H(N <sup>+</sup> H Guanidine) | GLN72           | Hydrogen Bond              | Conventional Hydrogen Bond | 2.48701      |
|                        |        | C(CH <sub>3</sub> )           | LEU115          | Hydrophobic                | Alkyl                      | 4.02616      |
| <b>-6.6</b>            | 3      | H(N <sup>+</sup> H)           | VAL166          | Hydrogen Bond              | Conventional Hydrogen Bond | 2.18458      |
|                        |        | H(N <sup>+</sup> H)           | GLN246          | Hydrogen Bond              | Conventional Hydrogen Bond | 2.70272      |
|                        |        | C(CH <sub>3</sub> )           | PRO202          | Hydrophobic                | Alkyl                      | 3.87114      |
| <b>-6.8</b>            | 4      | O(C=O)                        | ASN124          | Hydrogen Bond              | Conventional Hydrogen Bond | 2.41449      |
|                        |        | O(C=O)                        | ALA121          | Hydrogen Bond              | Carbon Hydrogen Bond       | 2.9377       |
| <b>-6</b>              | 5      | C(CH <sub>3</sub> )           | LEU222          | Hydrophobic                | Alkyl                      | 4.73127      |
| <b>-9.2</b>            | 6      | O(C=O)                        | GLN131          | Conventional Hydrogen Bond | Hydrogen Bond              | 3.03163      |
|                        |        | O(C=O)                        | GLN176          | Conventional Hydrogen Bond | Hydrogen Bond              | 2.43598      |
| <b>-8.1</b>            | 7      | O(C=O)                        | THR19           | Conventional Hydrogen Bond | Hydrogen Bond              | 2.52101      |
|                        |        | H(NH Amide)                   | THR19           | Conventional Hydrogen Bond | Hydrogen Bond              | 2.21853      |
|                        |        | H(NH Amide)                   | THR19           | Conventional Hydrogen Bond | Hydrogen Bond              | 2.31589      |

**Table S4.** Results of interaction details and docking score in (kJ/mol) of C<sub>6</sub>(LA)<sub>2</sub> ligand complexed in different binding sites on the surfaces on the zein structures (Q9SYT3\_MAIZE).

| Docking Score (kJ/mol) | Pocket | Ligand                        | Receptor Pocket | Interactions type          | Interactions category      | Distance (Å) |
|------------------------|--------|-------------------------------|-----------------|----------------------------|----------------------------|--------------|
| <b>-5.8</b>            | 1      | H(NH <sub>2</sub> Amide)      | GLN76           | Conventional Hydrogen Bond | Hydrogen Bond              | 2.23344      |
|                        |        | H(NH <sub>2</sub> Guanidine)  | GLN175          | Conventional Hydrogen Bond | Hydrogen Bond              | 2.94159      |
| <b>-4.4</b>            | 2      | O(C=O)                        | SER162          | Hydrogen Bond              | Carbon Hydrogen Bond       | 3.62409      |
|                        |        | C(CH <sub>3</sub> )           | PRO119          | Hydrophobic                | Alkyl                      | 4.98643      |
| <b>-6.8</b>            | 3      | H(N+H <sub>2</sub> Guanidine) | GLN246          | Hydrogen Bond              | Conventional Hydrogen Bond | 2.55795      |
|                        |        | H(NH <sub>2</sub> Guanidine)  | GLN246          | Hydrogen Bond              | Conventional Hydrogen Bond | 2.65436      |
| <b>-8.5</b>            | 4      | C(CH <sub>3</sub> )           | LEU173          | Hydrophobic                | Alkyl                      | 5.24164      |
|                        |        | C(CH <sub>3</sub> )           | TYR128          | Hydrophobic                | Pi-Orbitals                | 5.34872      |
| <b>-6.1</b>            | 5      | C(CH <sub>3</sub> )           | LEU222          | Hydrophobic                | Alkyl                      | 4.77224      |
| <b>-8.4</b>            | 7      | H(NH <sub>2</sub> Amide)      | ALA30           | Hydrogen Bond              | Conventional Hydrogen Bond | 2.59322      |
|                        |        | H(NH <sub>2</sub> Guanidine)  | THR19           | Hydrogen Bond              | Conventional Hydrogen Bond | 2.36816      |
|                        |        | C(CH <sub>3</sub> )           | PHE15           | Hydrophobic                | Pi-Alkyl                   | 5.15341      |

**Table S5.** Results of interaction details and docking score in (kJ/mol) of C<sub>9</sub>(LA)<sub>2</sub> ligand complexed in different binding sites on the surfaces on the zein structures (Q9SYT3\_MAIZE)

| Docking Score | Pocket   | Ligand                        | Receptor Pocket | Interactions type    | Interactions category      | Distance (Å) |
|---------------|----------|-------------------------------|-----------------|----------------------|----------------------------|--------------|
| <b>-6.3</b>   | <b>1</b> | O(C=O)                        | ARG218          | Hydrogen Bond        | Conventional Hydrogen Bond | 2.45363      |
|               |          | O(C=O)                        | ARG218          | Hydrogen Bond        | Conventional Hydrogen Bond | 2.6101       |
|               |          | H(N <sup>+</sup> H Guanidine) | GLU226          | Hydrogen Bond        | Conventional Hydrogen Bond | 1.9814       |
| <b>-3.5</b>   | <b>2</b> | C(CH <sub>2</sub> Spacer)     | ASN192          | Carbon Hydrogen Bond | Hydrogen Bond              | 3.38474      |
| <b>-6.4</b>   | <b>3</b> | H(N <sup>+</sup> H Guanidine) | GLN205          | Hydrogen Bond        | Conventional Hydrogen Bond | 2.72788      |
|               |          | H(N <sup>+</sup> H Guanidine) | GLN205          | Hydrogen Bond        | Conventional Hydrogen Bond | 2.831        |
|               |          | C(CH <sub>2</sub> Spacer)     | ASN168          | Hydrogen Bond        | Carbon Hydrogen Bond       | 3.06885      |
| <b>-7.1</b>   | <b>4</b> | H(N <sup>+</sup> H Guanidine) | GLN133          | Hydrogen Bond        | Conventional Hydrogen Bond | 2.21917      |
|               |          | C(CH <sub>3</sub> )           | LEU134          | Hydrophobic          | Alkyl                      | 5.10831      |
|               |          | C(CH <sub>3</sub> )           | LEU159          | Hydrophobic          | Alkyl                      | 5.41502      |
| <b>-7.2</b>   | <b>6</b> | O(C=O)                        | GLN180          | Hydrogen Bond        | Conventional Hydrogen Bond | 2.93727      |
|               |          | H(NH Amide)                   | GLN135          | Hydrogen Bond        | Conventional Hydrogen Bond | 2.39441      |
| <b>-8</b>     | <b>7</b> | H(NH Amide)                   | PHE22           | Hydrogen Bond        | Pi-Donor Hydrogen Bond     | 3.01253      |

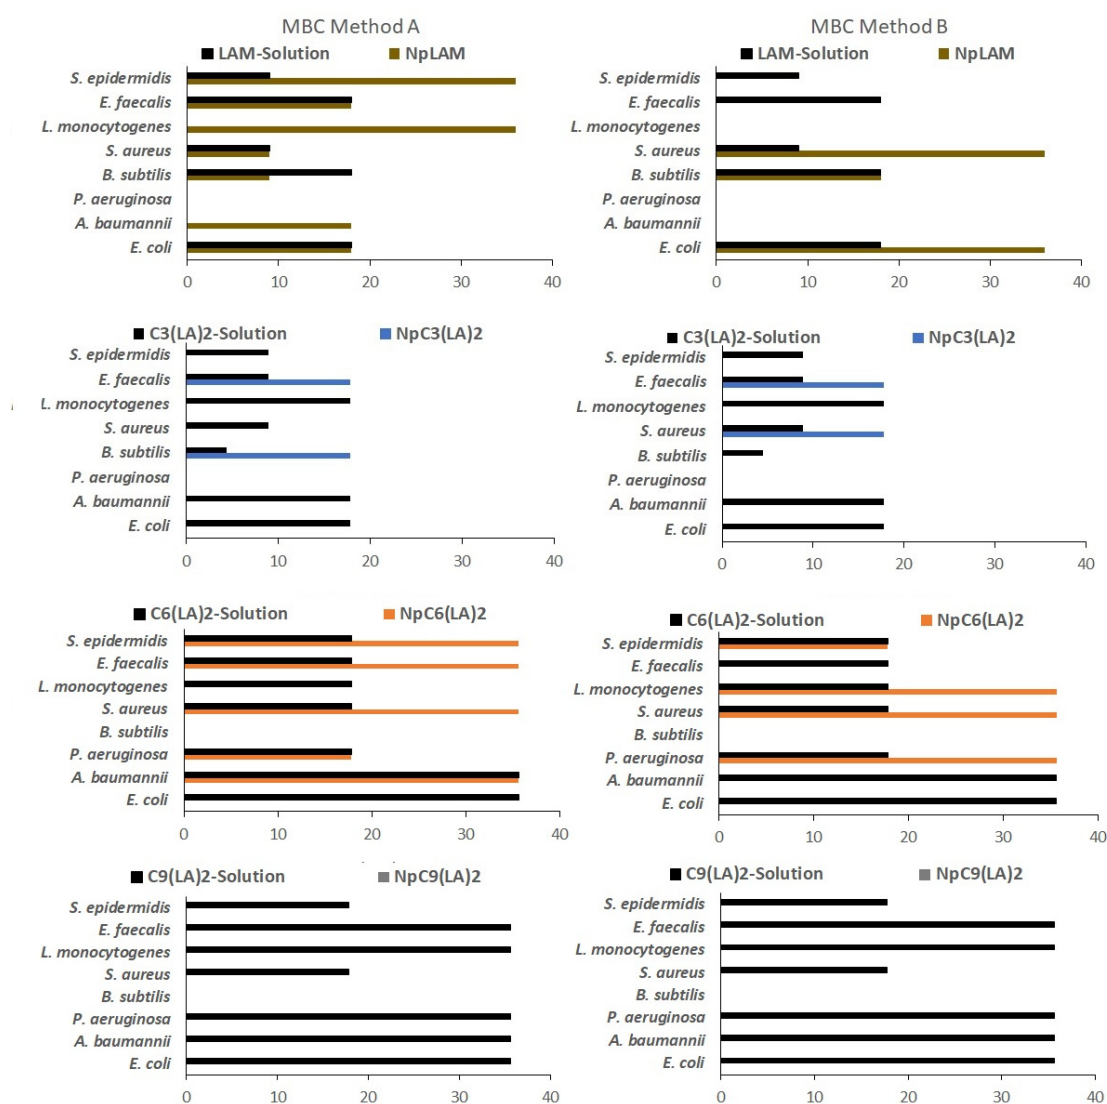

**Figure S1.** Determination of the MBC ( $\mu\text{g/ml}$ ) for LAM, C<sub>3</sub>(LA)<sub>2</sub>, C<sub>6</sub>(LA)<sub>2</sub>, C<sub>9</sub>(LA)<sub>2</sub> solutions and loaded-zein nanoparticles prepared by methods A and B against bacteria.

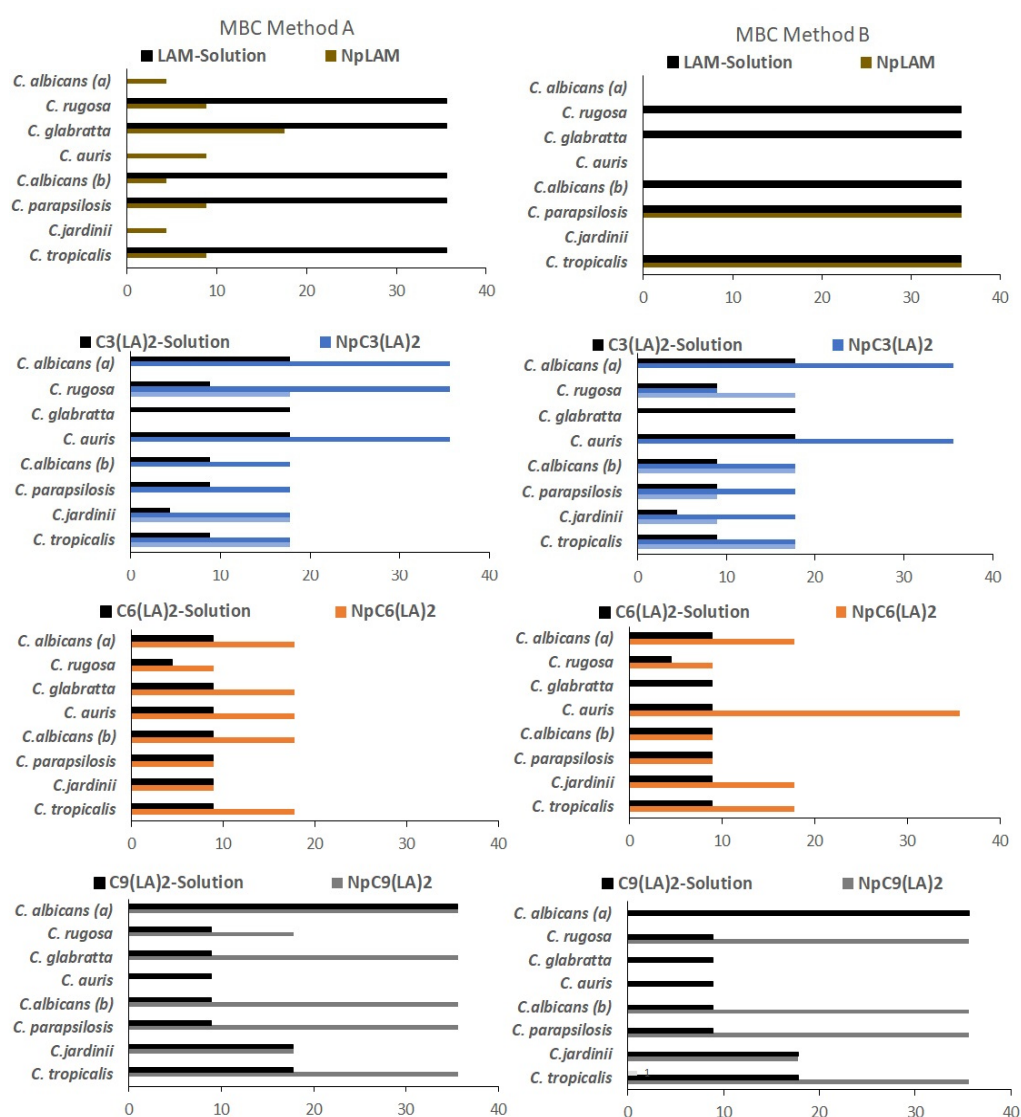

**Figure S2.** Determination of the MFC ( $\mu\text{g/ml}$ ) for LAM,  $\text{C}_3(\text{LA})_2$ ,  $\text{C}_6(\text{LA})_2$ ,  $\text{C}_9(\text{LA})_2$  solutions and loaded-zein nanoparticles prepared by methods A and B against yeasts.
